# Supplementary material for: Patterns of nonsyndromic tooth agenesis and sexual dimorphism
Source: Springer Nature journal article supplement (doi:10.1186/s12903-023-02753-1), 2023-01-23
Supplement: MOESM1 [file 23946312]

## Supplementary Data

### Patterns of nonsyndromic tooth agenesis and sexual dimorphism

Charinya Kanchanasevee<sup>1,2</sup>, Soranun Chantarangsu<sup>3</sup>, Pisha Pittayapat<sup>4</sup>, Thantrira Porntaveetus<sup>1,\*</sup>

<sup>1</sup>Center of Excellence in Genomics and Precision Dentistry, Department of Physiology, Faculty of Dentistry, Chulalongkorn University, Bangkok, Thailand

<sup>2</sup>Geriatric Dentistry and Special Patients Care Program, Faculty of Dentistry, Chulalongkorn University, Bangkok, 10330, Thailand

<sup>3</sup>Department of Oral Pathology, Faculty of Dentistry, Chulalongkorn University, Bangkok, Thailand

<sup>4</sup>Department of Radiology, Faculty of Dentistry, Chulalongkorn University, Bangkok, Thailand

\*Correspondence to:

Thantrira Porntaveetus, DDS, Grad Dip, MSc, PhD. ORCID number: 0000000301459801

Genomics and Precision Dentistry Research Unit, Department of Physiology, Faculty of Dentistry, Chulalongkorn University, Bangkok 10330, Thailand

Tel: 662-218-8695; Fax: 662-218-8691; E-mail: thantrira.p@chula.ac.th

**Short running title:** Tooth agenesis and sexual dimorphism

ORCID: CK: 0000-0001-7107-0709, SC: 0000-0002-3400-5585, PP: 0000-0001-9607-5450, TP: 0000-0003-0145-9801

**Supplementary Table 1. The prevalence of tooth agenesis.**

| Gender | Number of patients |              | Prevalence (%) |
|--------|--------------------|--------------|----------------|
|        | Examined (n)       | Affected (n) |                |
| Male   | 447                | 37           | 8.3            |
| Female | 643                | 64           | 9.9            |
| Total  | 1090               | 101          | 9.3            |

**Supplementary Table 2. The number and percentage of tooth agenesis for each tooth type in the same side (right or left) between the maxillary and mandibular arches.**

| Maxillary arch |                                        | Mandibular arch |                                         | P value                  | Maxillary arch |                                       | Mandibular arch |                                        | P value            |
|----------------|----------------------------------------|-----------------|-----------------------------------------|--------------------------|----------------|---------------------------------------|-----------------|----------------------------------------|--------------------|
| Tooth number   | Number, n (% of maxillary right teeth) | Tooth number    | Number, n (% of mandibular right teeth) |                          | Tooth number   | Number, n (% of maxillary left teeth) | Tooth number    | Number, n (% of mandibular left teeth) |                    |
| #11            | 0 (0)                                  | #41             | 7 (9.1)                                 | 0.051 <sup>b</sup>       | #21            | 2 (4.7)                               | #31             | 5 (8.5)                                | 0.696 <sup>b</sup> |
| #12            | 19 (45.2)                              | #42             | 33 (42.8)                               | 0.802 <sup>a</sup>       | #22            | 16 (38.1)                             | #32             | 18 (30.5)                              | 0.426 <sup>a</sup> |
| #13            | 3 (7.2)                                | #43             | 3 (3.9)                                 | 0.664 <sup>b</sup>       | #23            | 1 (2.4)                               | #33             | 0 (0)                                  | 0.416 <sup>b</sup> |
| #14            | 10 (23.8)                              | #44             | 6 (7.8)                                 | <b>0.014<sup>a</sup></b> | #24            | 10 (23.8)                             | #34             | 9 (15.2)                               | 0.278 <sup>a</sup> |
| #15            | 10 (23.8)                              | #45             | 28 (36.4)                               | 0.160 <sup>a</sup>       | #25            | 12 (28.6)                             | #35             | 27 (45.8)                              | 0.080 <sup>a</sup> |
| #16            | 0 (0)                                  | #46             | 0 (0)                                   | -                        | #26            | 1 (2.4)                               | #36             | 0 (0)                                  | 0.416 <sup>b</sup> |
| #17            | 0 (0)                                  | #47             | 0 (0)                                   | -                        | #27            | 0 (0)                                 | #37             | 0 (0)                                  | -                  |

<sup>a</sup>Chi-square test. <sup>b</sup>Fisher exact test. A significant difference ( $P < 0.05$ ) indicates in bold and underlined.

**Supplementary Table 3. The number and percentage of tooth agenesis for each tooth type in the right and left sides.**

| <b>Tooth type</b>     | <b>Right side,<br/>n (% of right teeth)</b> | <b>Left side,<br/>n (% of left teeth)</b> | <b>Total,<br/>n (% of total)</b> | <b>Chi-square<br/>value</b> | <b><i>P</i> value</b> |
|-----------------------|---------------------------------------------|-------------------------------------------|----------------------------------|-----------------------------|-----------------------|
| Central incisor       | 7 (5.9)                                     | 7 (6.9)                                   | 14 (6.4)                         | 0.101                       | 0.751 <sup>a</sup>    |
| Lateral incisor       | 52 (43.7)                                   | 34 (33.7)                                 | 86 (39.1)                        | 2.310                       | 0.129 <sup>a</sup>    |
| Canine                | 6 (5)                                       | 1 (1)                                     | 7 (3.2)                          | -                           | 0.128 <sup>b</sup>    |
| First premolar        | 16 (13.5)                                   | 19 (18.8)                                 | 35 (15.9)                        | 1.176                       | 0.278 <sup>a</sup>    |
| Second premolar       | 38 (31.9)                                   | 39 (38.6)                                 | 77 (35)                          | 1.072                       | 0.301 <sup>a</sup>    |
| First molar           | 0 (0)                                       | 1 (1)                                     | 1 (0.4)                          | -                           | 0.459 <sup>b</sup>    |
| Second molar          | 0 (0)                                       | 0 (0)                                     | 0 (0)                            | -                           | -                     |
| Total, n (% of total) | 119 (54.1)                                  | 101 (45.9)                                | 220 (100)                        |                             |                       |

<sup>a</sup>Chi-square test. <sup>b</sup>Fisher exact test

**Supplementary Table 4. The number and percentage of tooth agenesis for each tooth type in the same dental arch (maxillary or mandibular) between the right and left sides.**

| Maxillary arch |                                        |              |                                       |                    | Mandibular arch |                                         |              |                                        |                    |
|----------------|----------------------------------------|--------------|---------------------------------------|--------------------|-----------------|-----------------------------------------|--------------|----------------------------------------|--------------------|
| Right side     |                                        | Left Side    |                                       |                    | Right Side      |                                         | Left Side    |                                        |                    |
| Tooth number   | Number, n (% of maxillary right teeth) | Tooth number | Number, n (% of maxillary left teeth) | <i>P</i> value     | Tooth number    | Number, n (% of mandibular right teeth) | Tooth number | Number, n (% of mandibular left teeth) | <i>P</i> value     |
| #11            | 0 (0)                                  | #21          | 2 (4.7)                               | 0.494 <sup>b</sup> | #41             | 7 (9.1)                                 | #31          | 5 (8.5)                                | 0.900 <sup>a</sup> |
| #12            | 19 (45.2)                              | #22          | 16 (38.1)                             | 0.507 <sup>a</sup> | #42             | 33 (42.8)                               | #32          | 18 (30.5)                              | 0.140 <sup>a</sup> |
| #13            | 3 (7.2)                                | #23          | 1 (2.4)                               | 0.616 <sup>b</sup> | #43             | 3 (3.9)                                 | #33          | 0 (0)                                  | 0.258 <sup>b</sup> |
| #14            | 10 (23.8)                              | #24          | 10 (23.8)                             | 1.000 <sup>a</sup> | #44             | 6 (7.8)                                 | #34          | 9 (15.2)                               | 0.169 <sup>a</sup> |
| #15            | 10 (23.8)                              | #25          | 12 (28.6)                             | 0.620 <sup>a</sup> | #45             | 28 (36.4)                               | #35          | 27 (45.8)                              | 0.268 <sup>a</sup> |
| #16            | 0 (0)                                  | #26          | 1 (2.4)                               | 1.000 <sup>b</sup> | #46             | 0 (0)                                   | #36          | 0 (0)                                  | -                  |
| #17            | 0 (0)                                  | #27          | 0 (0)                                 | -                  | #47             | 0 (0)                                   | #37          | 0 (0)                                  | -                  |

<sup>a</sup>Chi-square test. <sup>b</sup>Fisher exact test.
